# Supplementary material
Source: publisher figshare collection journal article supplement (https://brill.figshare.com/articles/dataset/_/21781889)
Supplement: Supplementary file 1 [file 1]

## **Acoustic Startle Events in Trailers for US Horror Films**

**Nick Redfern**

Independent investigator, Leeds, UK

E-mail: [nickredfernres@outlook.com](mailto:nickredfernres@outlook.com)

ORCID iD: 0000-0002-7821-2404

**Supplementary material**
